# Supplementary material for: Handedness and the X chromosome: The role of androgen receptor CAG-repeat length
Source: PubMed Central journal article supplement (PMC4321186; doi:10.1038/srep08325), 2015-02-09

## Supplementary figures

### Handedness and the X chromosome: The role of androgen receptor

#### CAG-repeat length

Larissa Arning\*<sup>+1</sup>, Sebastian Ocklenburg<sup>+2</sup>, Stefanie Schulz<sup>2</sup>, Vanessa Ness<sup>2</sup>, Wanda M. Gerding<sup>1</sup>, Jan G. Hengstler<sup>3</sup>, Michael Falkenstein<sup>3</sup>, Jörg T. Epplen<sup>1</sup>, Onur Güntürkün<sup>2</sup>, Christian Beste<sup>4</sup>

#### Affiliations

<sup>1</sup>Department of Human Genetics, Ruhr-University, 44780 Bochum, Germany

<sup>2</sup>Institute of Cognitive Neuroscience, Biopsychology, Department of Psychology, Ruhr-University, 44780 Bochum, Germany

<sup>3</sup>Leibniz Research Centre for Working Environment and Human Factors (IfADo), 44139 Dortmund, Germany

<sup>4</sup>Cognitive Neurophysiology, Department of Child and Adolescent Psychiatry, Faculty of Medicine of the TU Dresden, 01309 Dresden, Germany

#### Figure Captions for supplementary figures

Supplementary figure S1: LQ distribution for female and male participants.

Supplementary figure S2: Handedness Direction 1 phenotypes (left-handed, right-handed) in relation to CAG-repeat length for male (A) and female participants (B: short allele; C: long allele). Error bars show standard error.

Supplementary figure S3: Handedness Consistency phenotypes (consistent, inconsistent) in relation to CAG-repeat length for male (A) and female participants (B: short allele; C: long allele). Error bars show standard error.

Figure Captions for supplementary figures

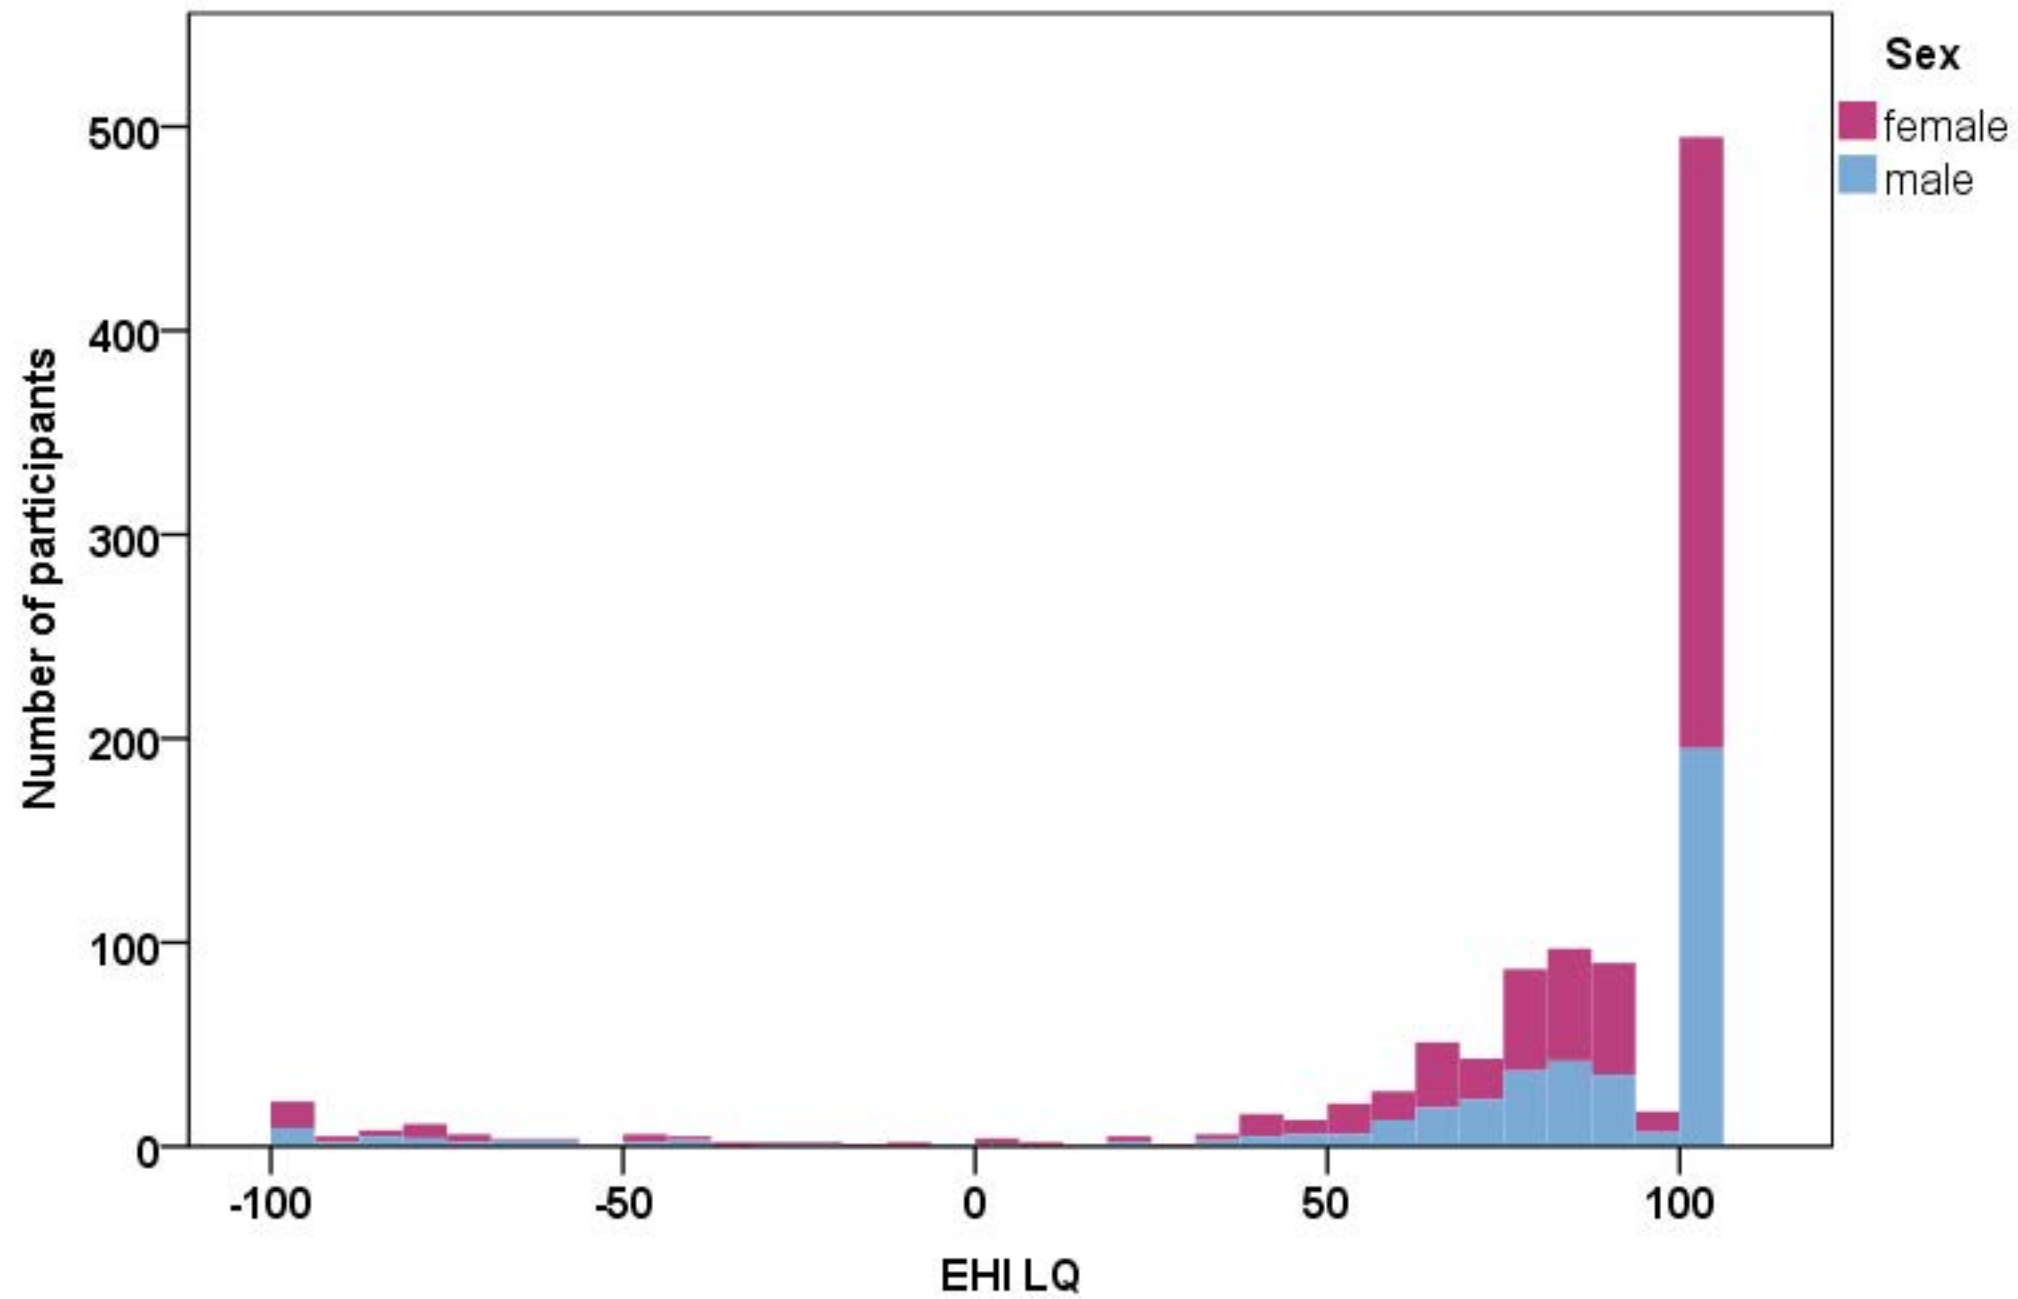

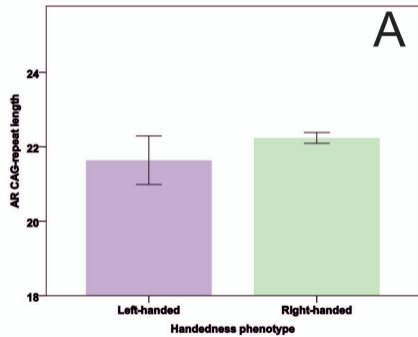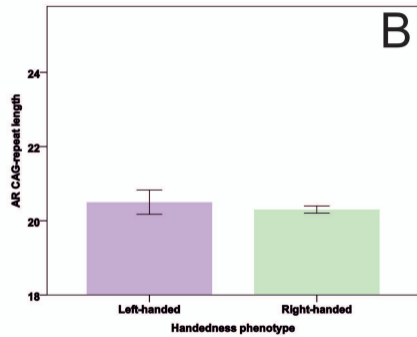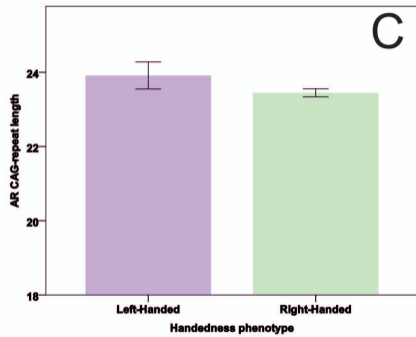

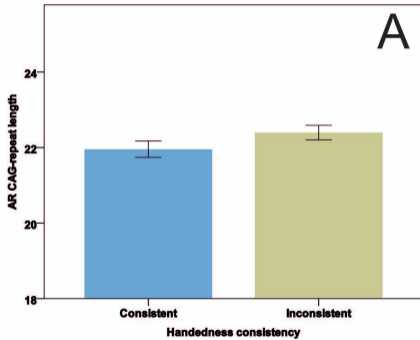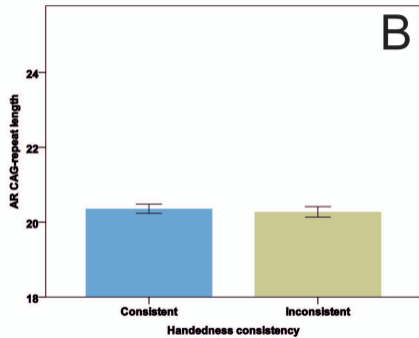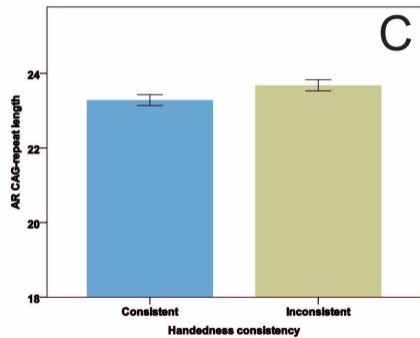

Supplement: srep08325-s1.pdf [file srep08325-s1.pdf]
